# Supplementary material for: Molecular Docking of SP40 Peptide towards Cellular Receptors for Enterovirus 71 (EV-A71)
Source: MDPI journal article supplement (doi:10.3390/molecules26216576), 2021-10-30
Supplement: s1 [file s1]

## Supplementary Materials

*Article*

# Molecular docking of SP40 peptide towards cellular receptors for Enterovirus 71 (EV-A71)

Malihe Masomian <sup>1, \*</sup>, Salima Lalani <sup>1</sup> and Chit Laa Poh <sup>1, \*</sup>

<sup>1</sup> Centre of Virus and Vaccine Research, School of Medical and Life Science, Sunway University, Bandar Sunway, 47500, Selangor, Malaysia; [malihem@sunway.edu.my](mailto:malihem@sunway.edu.my); [salima.l@imail.sunway.edu.my](mailto:salima.l@imail.sunway.edu.my); [pohcl@sunway.edu.my](mailto:pohcl@sunway.edu.my)

\* Correspondence: [malihem@sunway.edu.my](mailto:malihem@sunway.edu.my) (MM); [pohcl@sunway.edu.my](mailto:pohcl@sunway.edu.my) (CLP)  
Tel.: +603-74918622(Ext 7338)

**Table S1: General molecular docking of SP40 peptide with different target cellular receptors using HPEPDOCK software.**

| Receptors                          | Model 1 | Model 2 | Model 3 | Model 4 | Model 5 | Model 6 | Model 7 | Model 8 | Model 9 | Model 10 |
|------------------------------------|---------|---------|---------|---------|---------|---------|---------|---------|---------|----------|
| Nucleolin                          | -249.4  | -244.6  | -238.7  | -235.1  | -233.1  | -228.7  | -227.9  | -224.4  | -223.4  | -222.9   |
| Human cyclophilin                  | -231.8  | -223.8  | -217.3  | -212.7  | -212.4  | -210.1  | -209.7  | -209.3  | -209.1  | -207.7   |
| Human galectin                     | -229.2  | -198.7  | -197.3  | -193.7  | -188.7  | -186.9  | -186.3  | -186.1  | -185.6  | -185.0   |
| Fibronectin                        | -227.3  | -203.5  | -186.4  | -186.3  | -183.5  | -182.0  | -181.3  | -180.6  | -179.9  | -179.2   |
| SCARB2                             | -224.2  | -215.1  | -211.1  | -210.2  | -202.7  | -200.4  | -199.6  | -199.5  | -197.5  | -196.6   |
| DC-SIGN                            | -194.9  | -189.9  | -187.0  | -186.0  | -183.1  | -181.8  | -181.7  | -181.1  | -180.7  | -178.6   |
| Annexin                            | -193.4  | -179.5  | -178.6  | -177.6  | -177.4  | -174.1  | -173.6  | -170.9  | -170.0  | -169.4   |
| Human tryptophanyl-tRNA synthetase | -191.4  | -189.7  | -185.2  | -185.1  | -185.1  | -184.4  | -180.5  | -177.2  | -176.6  | -176.0   |
| Vimentin                           | -182.5  | -180.2  | -167.7  | -167.5  | -159.8  | -157.8  | -156.7  | -156.6  | -153.4  | -151.4   |
| Human prohibitin                   | -156.1  | -152.3  | -149.9  | -149.5  | -146.2  | -145.2  | -141.9  | -140.6  | -140.3  | -140.1   |

(A)

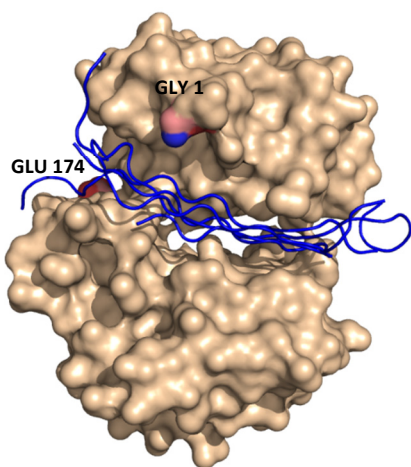

(B)

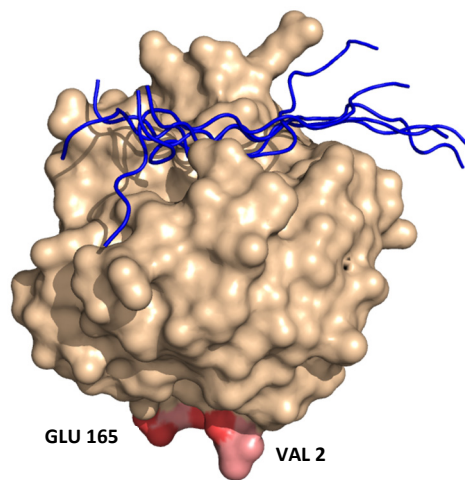

(C)

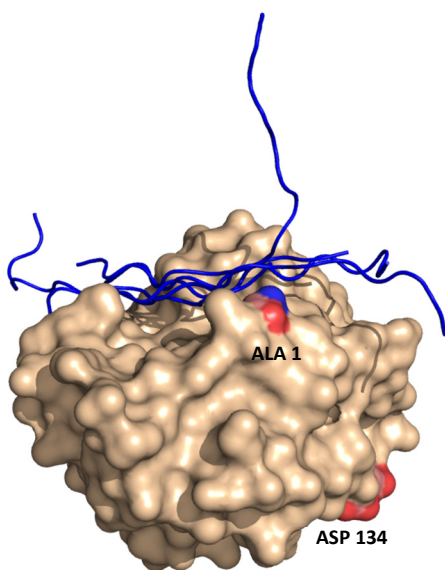

(D)

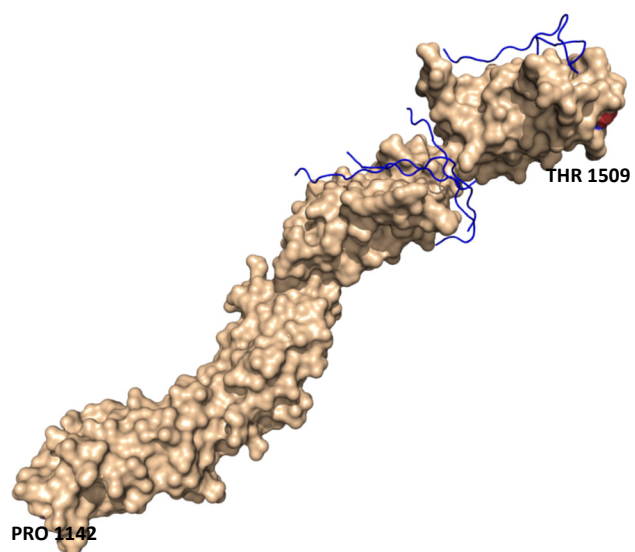

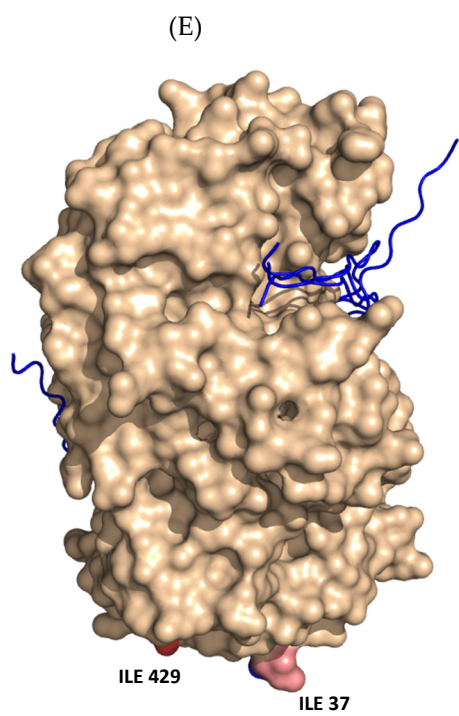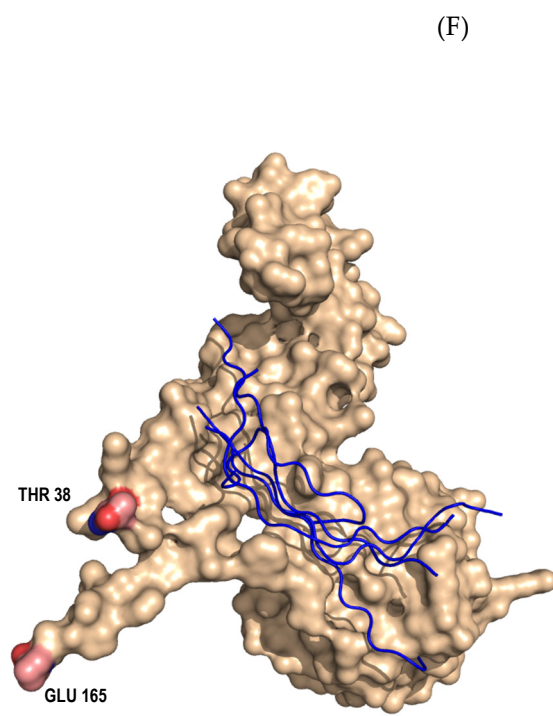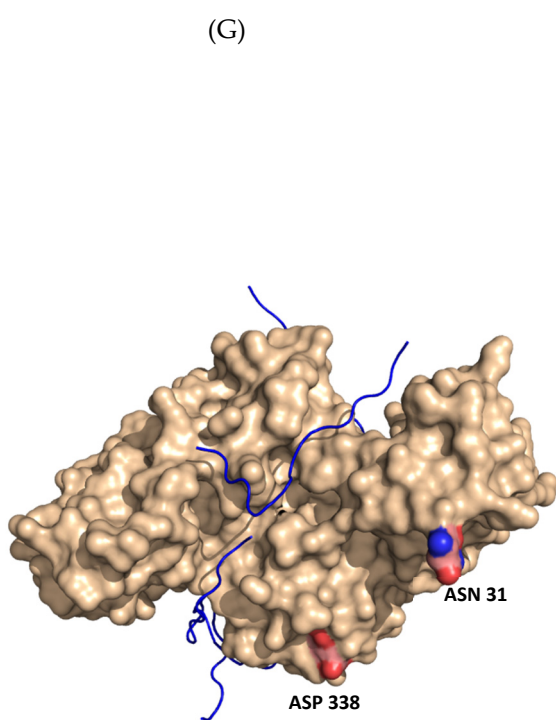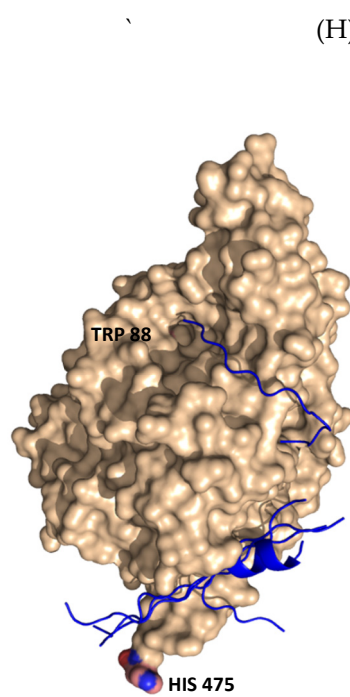

(I)

(J)

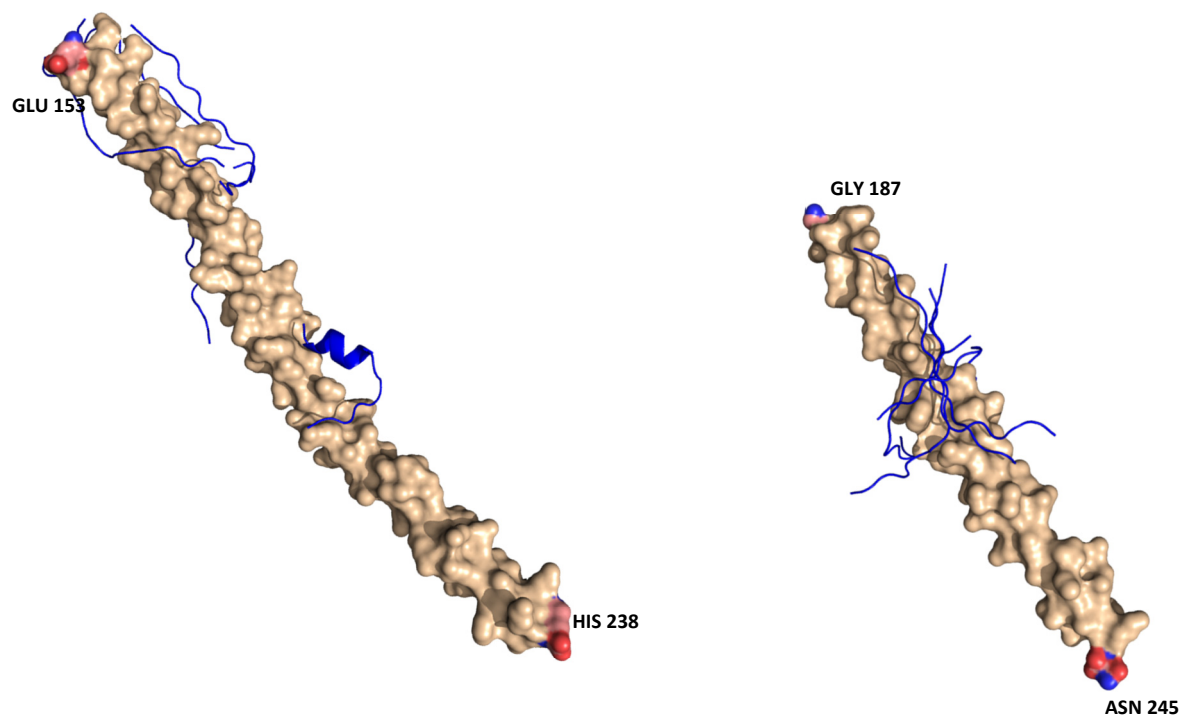

**Figure S1: The top- five binding poses of SP40 peptide interacting with the receptors in global molecular docking via HPEPDOCK.** The surface of the receptors and SP40 peptides are shown in wheat and blue colors, respectively. A: Nucleolin, B: Human cyclophilin, C: Human galectin, D: Fibronectin, E: SCARB2, F: DC-SIGN, G: Annexin A2, H: Human tryptophanyl-tRNA synthetase I, I: Vimentin and J: Human prohibitin.

**Table S2: Fitness Gold score of local molecular docking of SP40 peptide with different target cellular receptors using GOLD software**

| <b>Receptors</b>                          | <b>Model 1</b> | <b>Model 2</b> | <b>Model 3</b> | <b>Model 4</b> | <b>Model 5</b> |
|-------------------------------------------|----------------|----------------|----------------|----------------|----------------|
| <b>Nucleolin</b>                          | <b>125.25</b>  | 116.64         | 101.35         | 90.92          | 114.91         |
| <b>Annexin A2</b>                         | 97.22          | 107.62         | 91.01          | <b>113.48</b>  | 104.27         |
| <b>SCARB2</b>                             | 94.39          | <b>110.9</b>   | 96.55          | 107.16         | 87.86          |
| <b>Vimentin</b>                           | 79.24          | 67.92          | 54.97          | <b>109.19</b>  | 65.73          |
| <b>Human tryptophanyl-tRNA synthetase</b> | 96.75          | 92.98          | 100.05         | <b>108.5</b>   | 97.49          |
| <b>Human cyclophilin</b>                  | <b>107.75</b>  | 105.87         | 86.73          | 84.53          | 93.33          |
| <b>Fibronectin</b>                        | 88.94          | 82.72          | 105.53         | <b>107.02</b>  | 106.83         |
| <b>DC-SIGN</b>                            | 79.87          | 94.49          | 89.58          | 60.3           | <b>105.74</b>  |
| <b>Human galectin</b>                     | 81.06          | 86.3           | 98.83          | 95.46          | <b>99.2</b>    |
| <b>Human prohibitin</b>                   | 54.05          | <b>55.43</b>   | 11             | 0              | 40.91          |
